# Supplementary material for: Bimetallic metal–organic framework glass as a highly efficient bifunctional electrocatalyst for overall water splitting: the roles of metal sites
Source: Royal Society of Chemistry journal article supplement (doi:10.1039/d4ta04168b), 2024-01-01
Supplement: d4ta04168b1.pdf [file d4ta04168b1.pdf]

## Supporting Information

# **Bimetallic metal-organic framework glass as highly efficient bifunctional electrocatalyst for overall water splitting: the roles of metal sites**

Song Xue<sup>1</sup>, Fengliang Cao<sup>1</sup>, Yin Huang<sup>1</sup>, Shujin Hou<sup>2</sup>, Xiyong Fan<sup>1,3,4,5,\*</sup>

<sup>1</sup>*Research Center on Advanced Chemical Engineering and Energy Materials, China University of Petroleum (East China), Qingdao 266580, China*

<sup>2</sup>*Department of Chemistry and Biochemistry and the Oregon Center for Electrochemistry, University of Oregon, Eugene, OR, 97403, USA*

<sup>3</sup>*CAS Key Laboratory of Biobased Materials, Qingdao Institute of Bioenergy and Bioprocess Technology, Chinese Academy of Sciences, No. 189, Songling Road, Qingdao 266101, China*

<sup>4</sup>*Shandong Energy Institute, No. 189, Songling Road, Qingdao 266101, China*

<sup>5</sup>*Qingdao New Energy Shandong Laboratory, No. 189, Songling Road, Qingdao 266101, China*

Corresponding author: fanxy@qibebt.ac.cn

## 1. Supplementary experimental section

**X-ray absorption spectroscopy measurements:** This beamline is connected to an undulator and equipped with two gratings that offer soft X-rays from 20 to 600 eV with a typical photon flux of  $5 \times 10^{10}$  photons/s and a resolution ( $E/\Delta E$ ) better than  $10^5$  at 29 eV. This system is comprised of four ultrahigh vacuum (UHV) chambers including analysis chamber, preparation chamber, molecular beam epitaxy (MBE) chamber, and a radial distribution chamber. The base pressures are  $7 \times 10^{-11}$ ,  $1 \times 10^{-10}$ ,  $5 \times 10^{-10}$  and  $2 \times 10^{-11}$  mbar, respectively. A sample load-lock system is connected to the sample transfer chamber. The analysis chamber is equipped with a VG Scienta R4000 analyzer, a monochromatic Al *K $\alpha$*  X-ray source, a UV light source, low energy electron diffraction (LEED), a flood electron gun, and a manipulator with high precision and five-degree-of-freedom. The preparation chamber comprises an ion gun, a quartz crystal microbalance (QCM), a residual gas analyzer, a manipulator with high precision and four-degree-of-freedom, and several evaporators. The MBE chamber houses a QCM, several evaporators and a manipulator with two-degree-of-freedom. With this radial distribution chamber, the time for each transfer process between two chambers is less than 1 minute.

## 2. Supplementary figures and tables

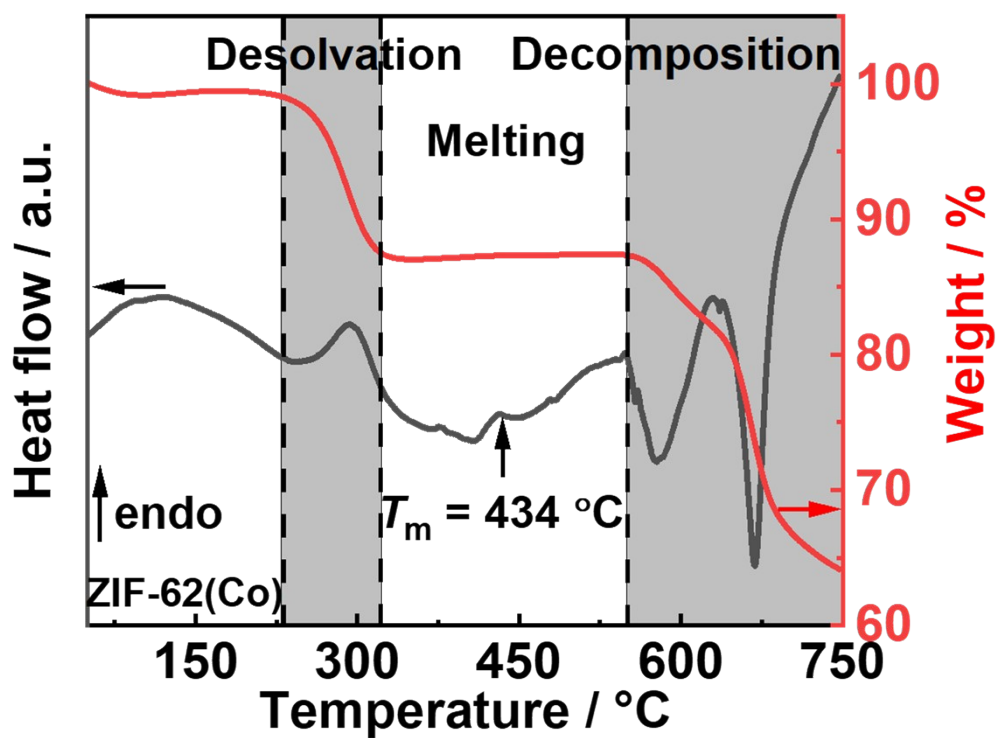

Figure S1 TG-DSC curve of the crystalline ZIF-62(Co).

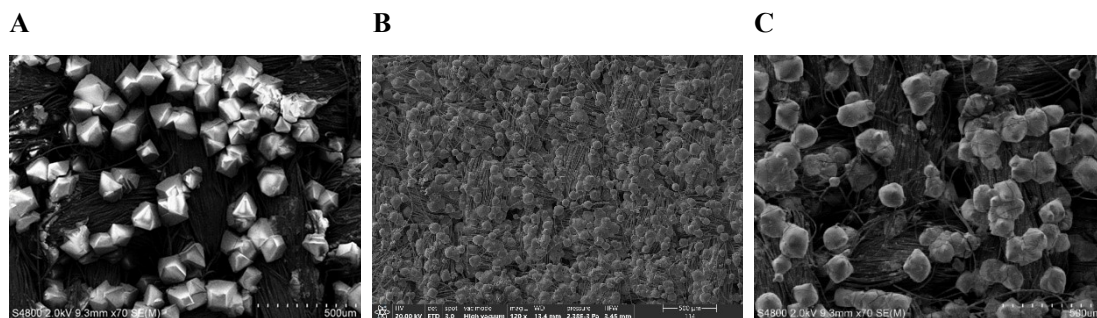

Figure S2 SEM images of the crystalline ZIF-62(Co) (A), glassy ZIF-62(Co) (B), and glassy ZIF-62(Co)-Ni (C) on the carbon fibers.

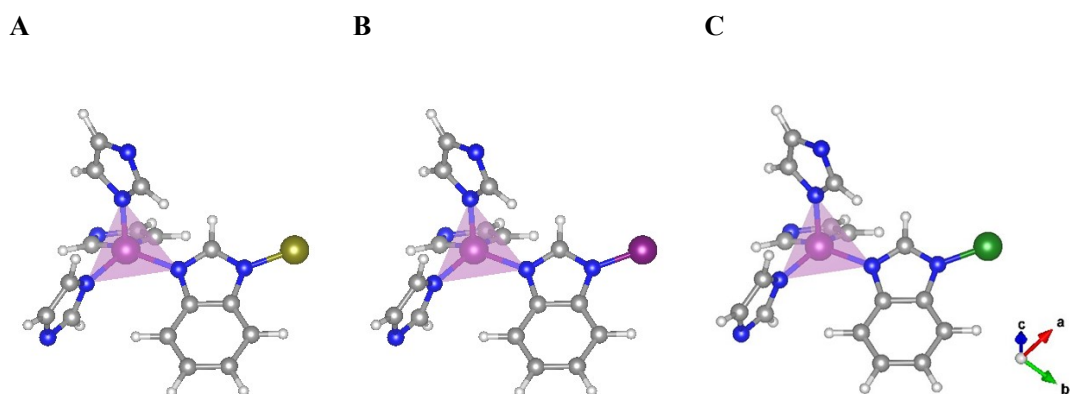

**Figure S3** Models used in the DFT calculations: (A) ZIF-62(Co)-Fe; (B) ZIF-62(Co)-Co; (C) ZIF-62(Co)-Ni. White spheres: hydrogen; grey spheres: carbon; blue spheres: nitrogen; purple spheres: cobalt; gold spheres: iron; green spheres: nickel.

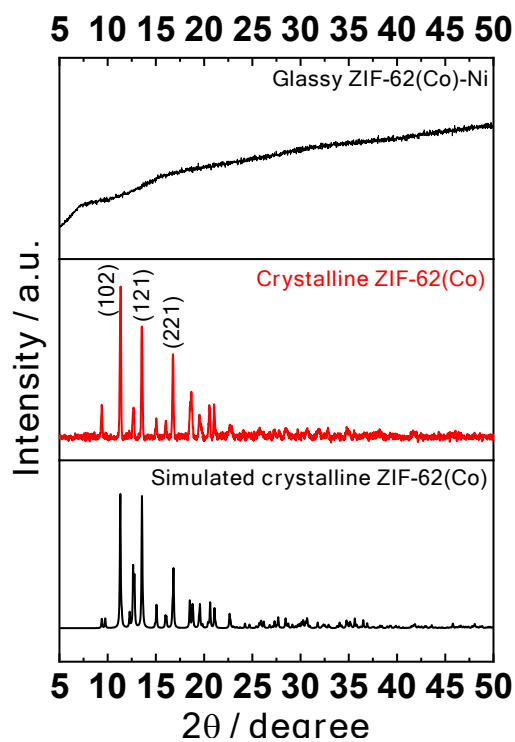

**Figure S4** XRD pattern of glassy ZIF-62(Co)-Ni. The experimental and simulated results of the crystalline ZIF-62(Co) were also provided.

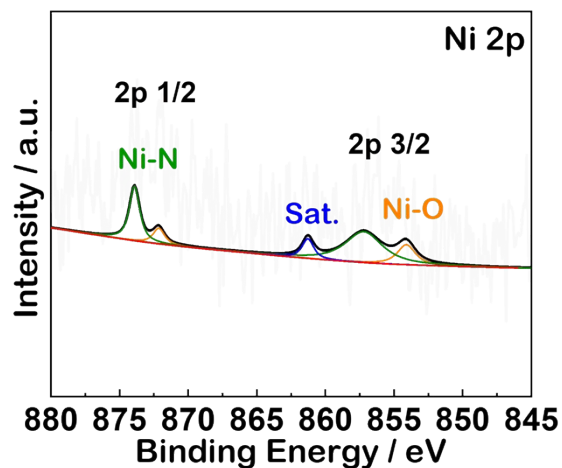

**Figure S5** High-resolution Ni 2p XPS spectrum of the glassy ZIF-62(Co)-Ni.

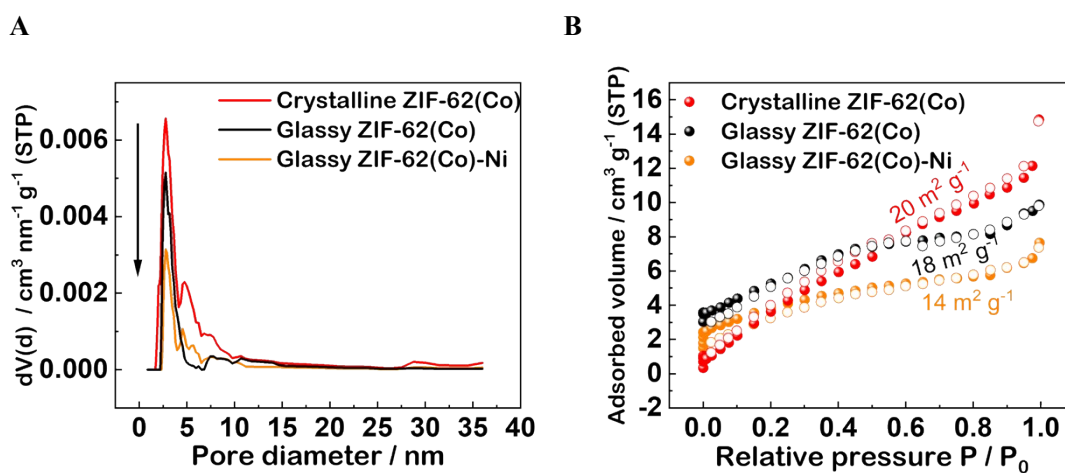

**Figure S6** BET analysis for the crystalline ZIF-62(Co), glassy ZIF-62(Co), and glassy ZIF-62(Co)-Ni. (A) BJH pore size distribution and (B) N<sub>2</sub> adsorption and desorption isotherms.

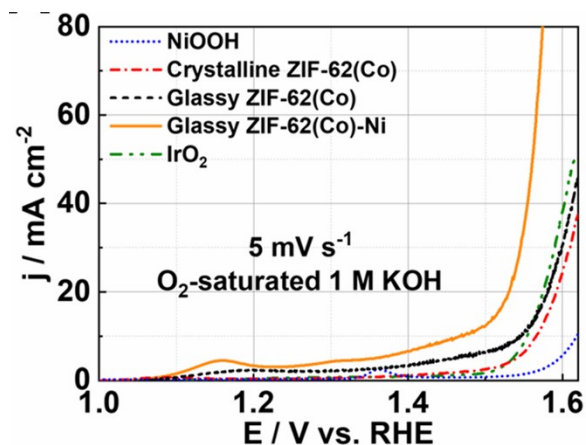

**Figure S7** LSV curves of crystalline ZIF-62(Co), glassy ZIF-62(Co), glassy ZIF-62(Co)-Ni, NiOOH, and IrO<sub>2</sub>, measured in O<sub>2</sub>-saturated 1 M KOH at a scan rate of 5 mV s<sup>-1</sup>. Note that the LSV measurements shown here were performed from low to high potential, while those in Figure 4 A were performed from high to low potential to avoid the possible oxidation effects.

A

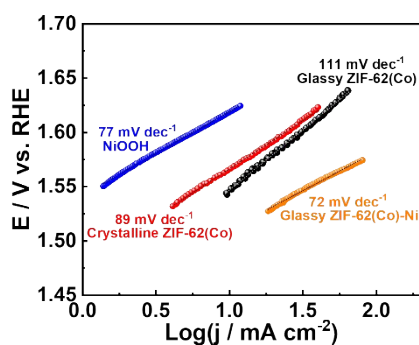

B

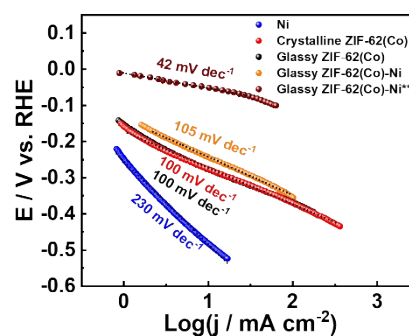

**Figure S8** Tafel slopes calculated of glassy ZIF-62(Co)-Ni electrodes used for OER (A) and HER (B). The values obtained of crystalline ZIF-62(Co), glassy ZIF-62(Co), NiOOH, and Ni were also given for comparison.

A

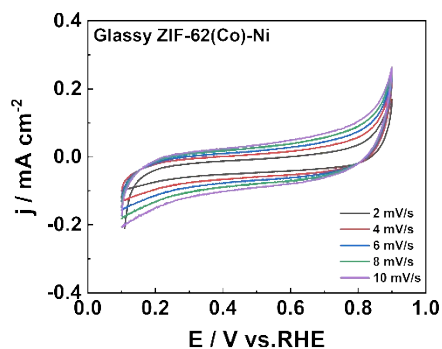

B

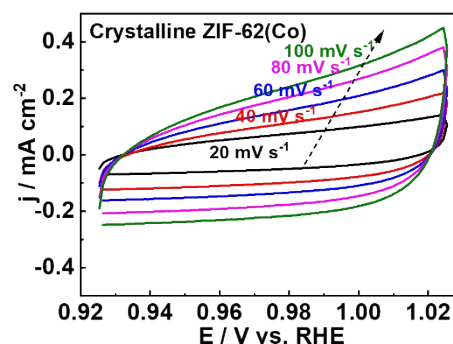

C

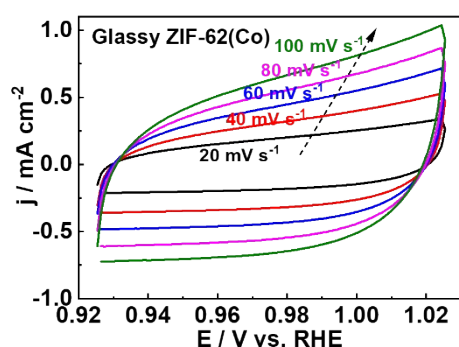

D

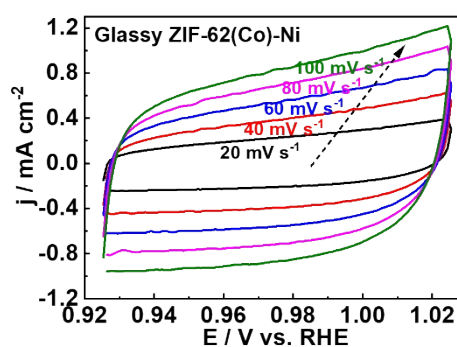

**Figure S9** (A) CV curves of glassy ZIF-62(Co)-Ni in a non-Faradaic region at the scan rates of 2, 4, 6, 8, and 10 mV s<sup>-1</sup>. CV curves of crystalline ZIF-62(Co) (B), glassy ZIF-62(Co) (C), and glassy ZIF-62(Co)-Ni (D) at the scan rates of 20, 40, 60, 80, and 100 mV s<sup>-1</sup>.

A

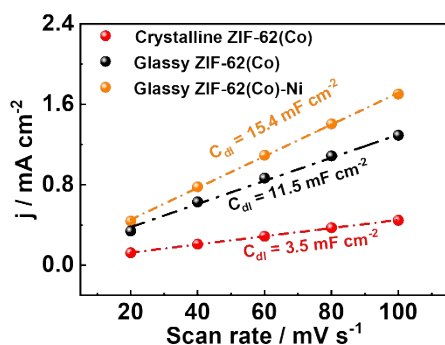

B

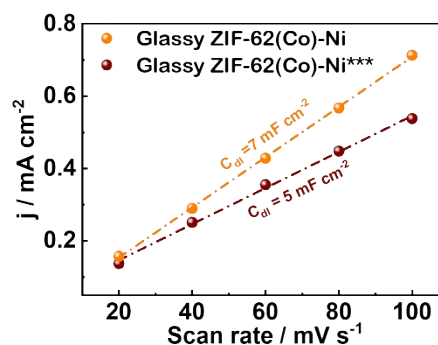

**Figure S10** (A) Dependence of capacitive current on scan rates of crystalline ZIF-62(Co), glassy ZIF-62(Co), and glassy ZIF-62(Co)-Ni electrodes. (B) Dependence of capacitive current on scan rates of glassy ZIF-62(Co)-Ni and glassy ZIF-62(Co)-Ni\*\*\* electrodes with a nickel content of 0.5 and 1.9 wt.% after increasing the melting time to 1 h.

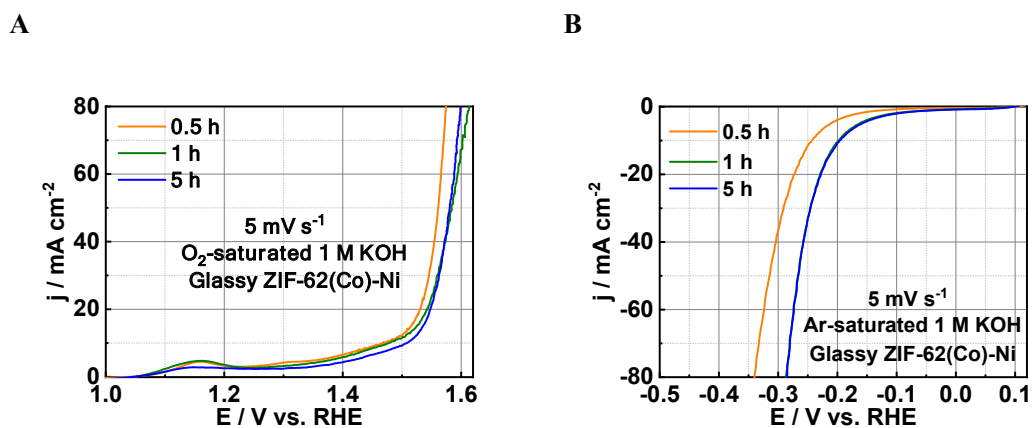

**Figure S11** (A) OER and (B) HER performance of glassy ZIF-62(Co)-Ni with varied melting times at a thermal temperature of 475 °C. Note that the curve of 1 h is overlapped with that of 5 h in Figure B.

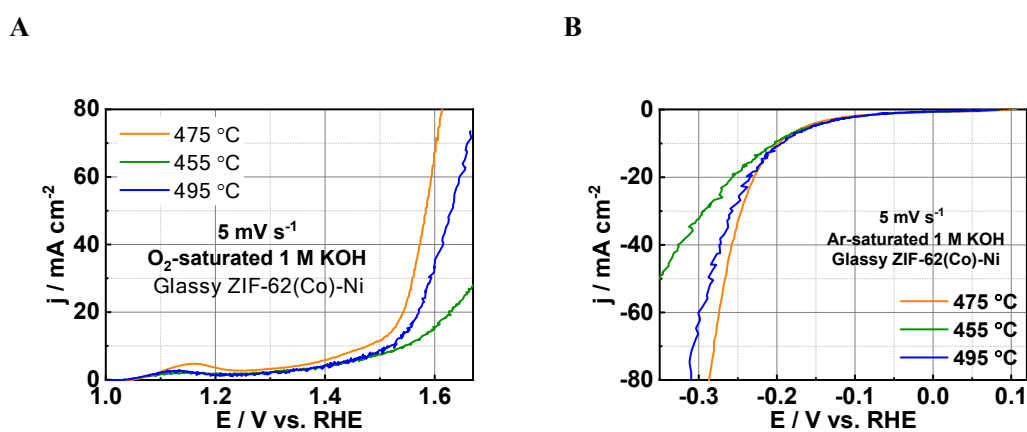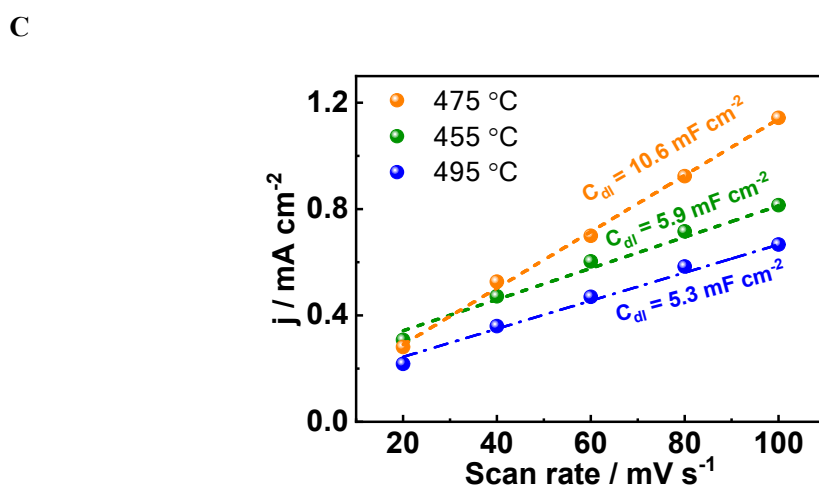

**Figure S12** (A) OER and (B) HER performance of glassy ZIF-62(Co)-Ni with varied melting temperatures. Note that the melt times selected for ZIFs towards OER and HER were 0.5 h and 1 h, respectively. (C) Dependence of capacitive current on scan rates of glassy ZIF-62(Co)-Ni electrodes with varied melting temperatures.



A

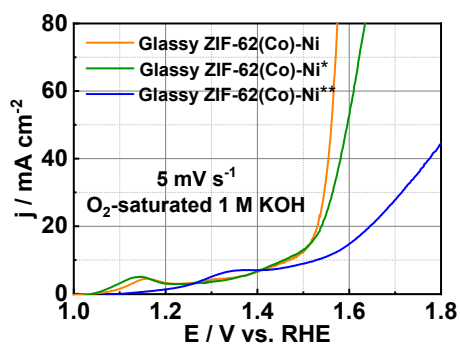

B

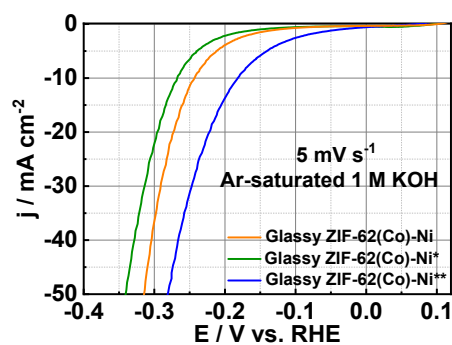

**Figure S13** (A) OER and (B) HER performance of glassy ZIF-62(Co)-Ni with varied nickel doping amounts. The Nickel mass content in glassy ZIF-62(Co)-Ni\*, glassy ZIF-62(Co)-Ni, and glassy ZIF-62(Co)-Ni\*\* were 0.1, 0.5, and 0.8 wt. %, according to the ICP-MS analysis (Table S1). Note that the melt time and temperature selected for ZIFs are 0.5 h and 475 °C, respectively.

A

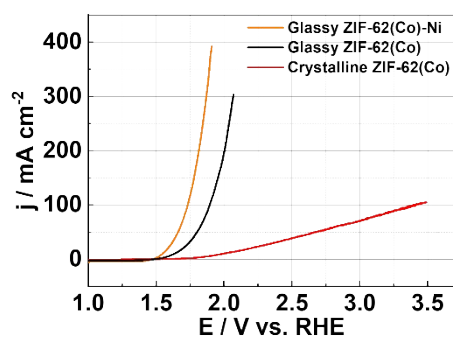

B

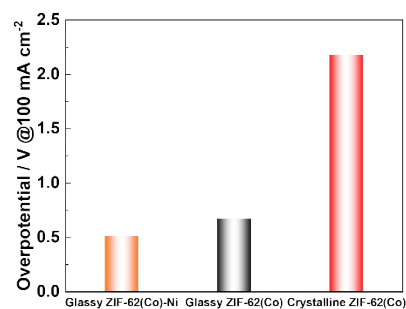

**Figure S14** (A) Polarization curves of glassy ZIF-62(Co)-Ni, glassy and crystalline ZIF-62(Co) for catalyzing overall water splitting in Ar-saturated 1 M KOH at a scan rate of 5 mV s<sup>-1</sup>. (B) Corresponding overpotential comparison for overall water splitting at a current density of 100 mA cm<sup>-2</sup>.

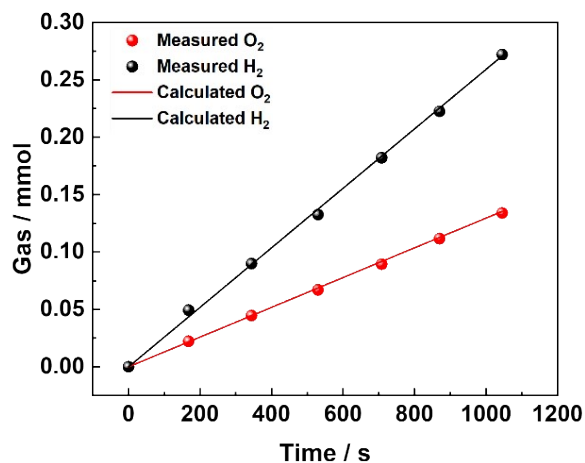

**Figure S15** Measured O<sub>2</sub> and H<sub>2</sub> yields using Archimedes' method. Solids lines represent the gas evolution at 100% Faradaic efficiency.

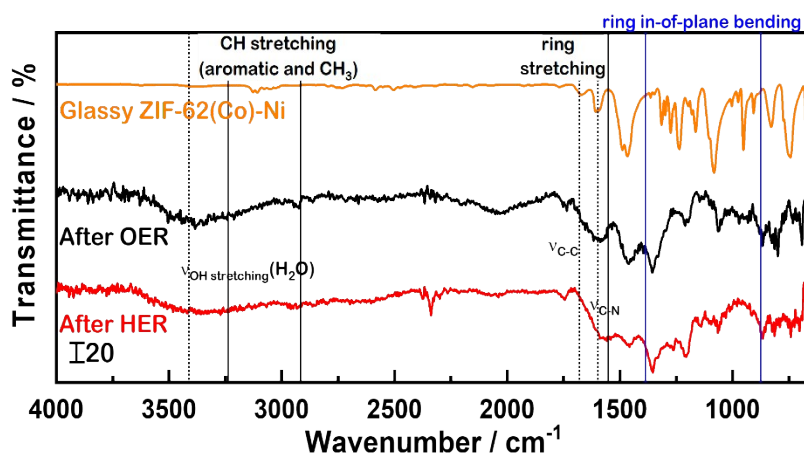

**Figure S16** FT-IR spectra of the glassy ZIF-62(Co)-Ni electrodes after OER and HER, in which the origin one was also given.

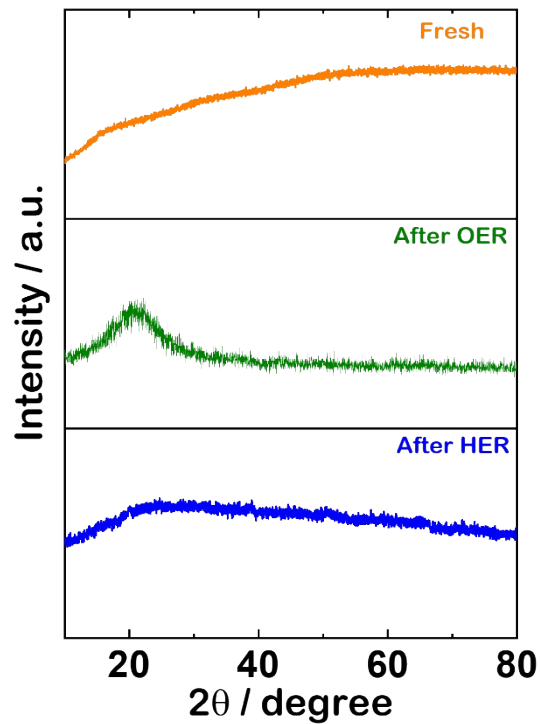

**Figure S17** XRD patterns of anodic and cathodic glassy ZIF-62(Co)-Ni after the AST. The fresh glassy ZIF-62(Co)-Ni spectrum was also shown for comparison.

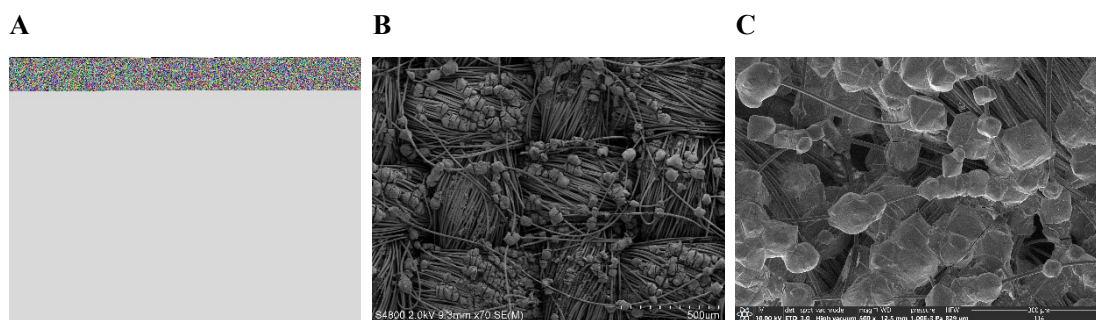

**Figure S18** SEM image of the crystalline ZIF-62(Co) (A), after OER (B), and after HER (C).

A

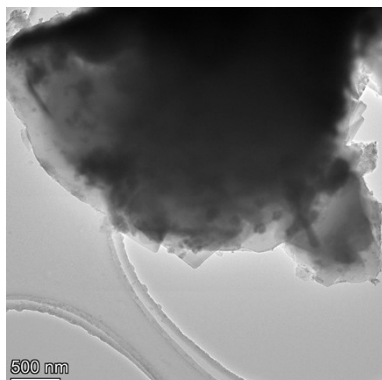

B

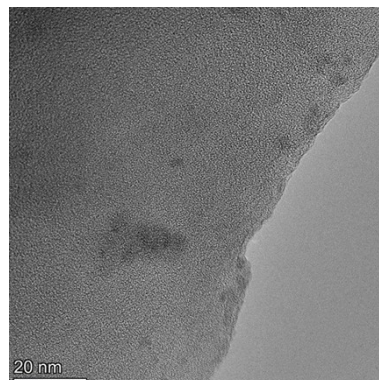

**Figure S19** TEM images of the anodic glassy ZIF-62(Co)-Ni after the AST. No obvious corrosion was observed.

A

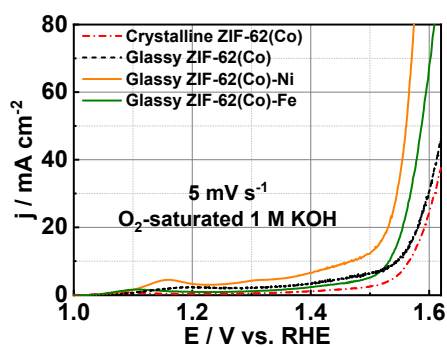

B

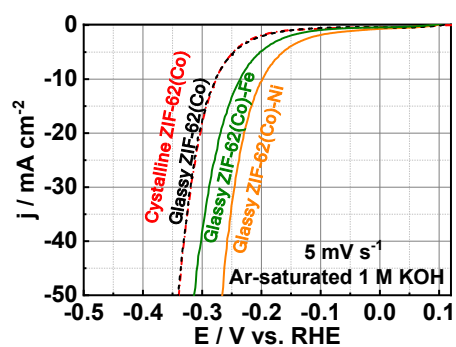

**Figure S20** (A) OER and (B) HER performance of the glassy ZIF-62(Co)-Fe. The preparation procedure of the glassy ZIF-62(Co)-Fe was similar to that of the glassy ZIF-62(Co)-Ni, but the iron nitrate was used to replace nickel nitrate. The melt temperature was 475 °C. The melt time for OER electrodes was 0.5 h, while for HER electrodes was 1 h. The activities of the glassy ZIF-62(Co)-Ni, glassy ZIF-62(Co), and crystalline ZIF-62(Co) were also given for comparison.

A

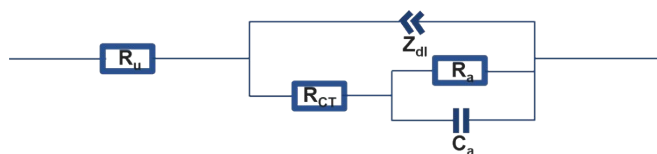

B

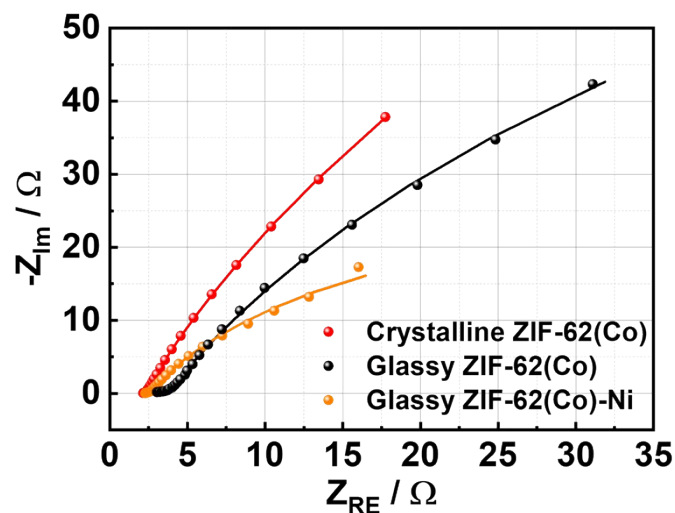

**Figure S21** (A) Equivalent electric circuit used for fitting the obtained impedance results in all of the measurements.  $R_u$  represents the uncompensated resistance of the electrolyte;  $Z_{dl}$  the double layer capacitance;  $R_{ct}$  charge transfer resistance;  $R_a$  adsorption resistance;  $C_a$  adsorption capacitance. (B) Nyquist plots of crystalline ZIF-62(Co), glassy ZIF-62(Co), and glassy ZIF-62(Co)-Ni obtained at a potential of  $\sim 0.93 V_{RHE}$ . Void and solid curves are original and fitting data, respectively.

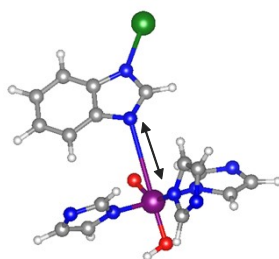

**Figure S22** Atomic configuration of OOH adsorbed on the Co site of the glassy ZIF-62(Co)-Ni. The (benz)imidazole binding was somewhat weakened, likely resulting in the characteristic peak of imidazole shifting to lower wavenumbers as well as weakening.

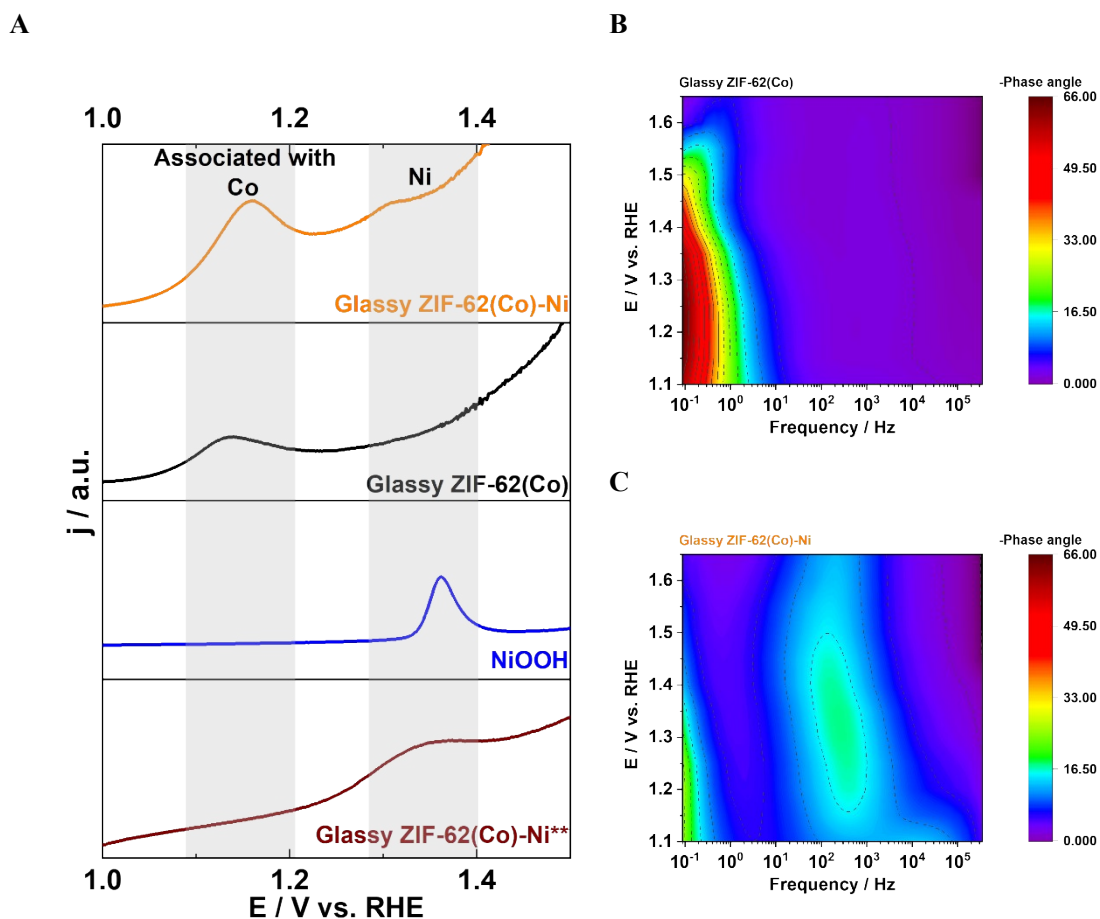

**Figure S23** (A) Voltammograms for glassy ZIF-62(Co)-Ni, glassy ZIF-62(Co), NiOOH, and glassy ZIF-62(Co)-Ni\*\* in 1 M KOH at a scan rate of  $5 \text{ mV s}^{-1}$ . Operando electrochemical impedance spectroscopy (EIS) on (B) glassy ZIF-62(Co) and (C) glassy ZIF-62(Co)-Ni in 1 M KOH at applied potentials from 1.1 to  $1.65 V_{\text{RHE}}$ .

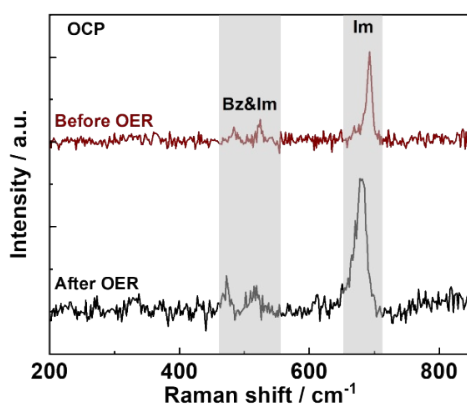

**Figure S24** *In-situ* Raman spectra of glassy ZIF-62(Co)-Ni at open circuit potential (OCP) before and after OER.

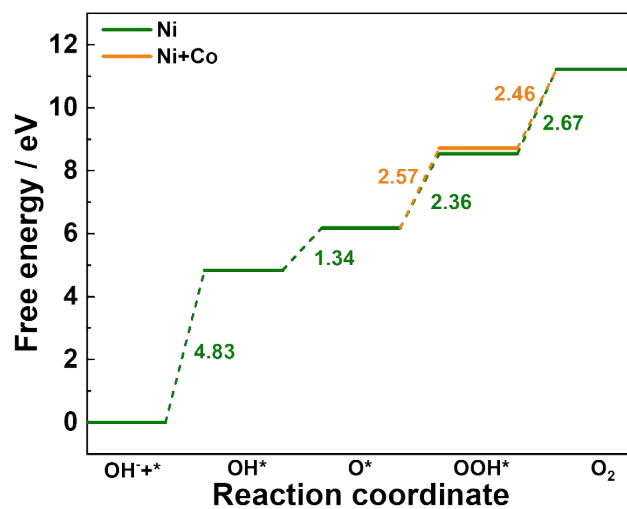

**Figure S25** Free energy diagram for OER on Ni+Co and Ni sites. Note that the DFT calculation for the Ni+Co sites was intricate. Thus, the hydroxyl spillover was assessed by accounting for the formation of hydroxyl radicals and adsorbed OOH, elucidating its impact on Step III.

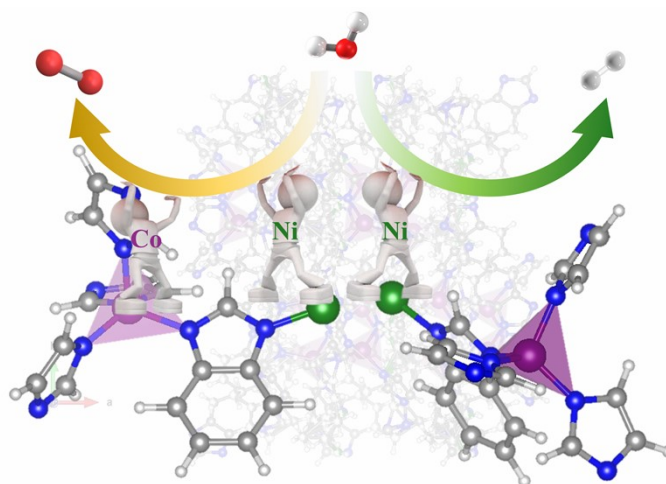

**Figure S26** Bimetallic functionality proposed on the glassy ZIF-62(Co)-Ni towards oxygen and hydrogen evolution.

**Table S1.** Nickel mass content in ZIF-62(Co)-Ni with varied nickel doping amounts using the ICP-MS.

| <b>Samples</b>          | <b>Ni (wt. %)</b> |
|-------------------------|-------------------|
| <b>ZIF-62(Co)-Ni*</b>   | 0.1               |
| <b>ZIF-62(Co)-Ni</b>    | 0.6               |
| <b>ZIF-62(Co)-Ni**</b>  | 0.9               |
| <b>ZIF-62(Co)-Ni***</b> | 1.9               |
